# Supplementary material for: Magnetically separable type-II semiconductor based ZnO/MoO3 photocatalyst: a proficient system for heteroarenes arylation and rhodamine B degradation under visible light
Source: Royal Society of Chemistry journal article supplement (doi:10.1039/d2nj00906d), 2022-01-01
Supplement: d2nj00906d1.pdf [file d2nj00906d1.pdf]

## Magnetically Separable Type-II Semiconductor based ZnO/MoO<sub>3</sub> Photocatalyst: A Proficient System for Heteroarenes Arylation and Rhodamine B Degradation under Visible Light

Bhawna Kaushik<sup>a</sup>, Pooja Rana<sup>a</sup>, Deepti Rawat<sup>b</sup>, Kanika Solanki<sup>a</sup>, Sneha Yadav<sup>a</sup>, Pooja Rana<sup>a</sup>, R.K. Sharma<sup>a\*</sup>

<sup>a</sup>Green Chemistry Network Centre, Department of Chemistry, University of Delhi, New Delhi-110007, India; Tel: 011-276666250, E-mail: [rksharmagreenchem@hotmail.com](mailto:rksharmagreenchem@hotmail.com)

<sup>b</sup>Department of Chemistry, Miranda House College, University of Delhi, New Delhi-110007, India.

### Table of Contents

|    |                                                                                                                                         |     |
|----|-----------------------------------------------------------------------------------------------------------------------------------------|-----|
| 1. | <b>RESULT AND DISCUSSION</b>                                                                                                            | S2  |
|    | <i>1.1 Spectrum of the Philips LED</i>                                                                                                  | S2  |
|    | <i>1.2 SEM analysis</i>                                                                                                                 | S2  |
|    | <i>1.3 XRD analysis</i>                                                                                                                 | S3  |
|    | <i>1.4 FTIR analysis</i>                                                                                                                | S3  |
|    | <i>1.5 TGA analysis</i>                                                                                                                 | S4  |
|    | <i>1.6 VSM analysis</i>                                                                                                                 | S4  |
|    | <i>1.7 EDS and ED-XRF analysis</i>                                                                                                      | S5  |
| 2. | <b>TABLES</b>                                                                                                                           | S5  |
|    | Table S1a. Comparison of the catalytic activities of C-H arylation of aryl iodide with arenes with the earlier reported photocatalysts. | S5  |
|    | Table S1b. Comparison of the degradation of Rhodamine B with the earlier reported photocatalysts.                                       | S7  |
| 3. | <b><sup>1</sup>H AND <sup>13</sup>C NMR DATA OF THE CORRESPONDING PRODUCTS</b>                                                          | S9  |
| 4. | <b><sup>1</sup>H AND <sup>13</sup>C NMR SPECTRAL DATA OF THE CORRESPONDING</b>                                                          | S11 |

|    |                           |     |
|----|---------------------------|-----|
|    | <b>PRODUCTS</b>           |     |
| 5. | <b>GCMS SPECTRA</b>       | S19 |
| 6. | <b>PHOTOREACTOR SETUP</b> | S21 |
| 7. | <b>REFERENCES</b>         | S22 |

## 1. Results and discussion

### 1.1. Spectrum of the Philips LED

The below provide spectrum shows the emission in the range of 400-800 nm.

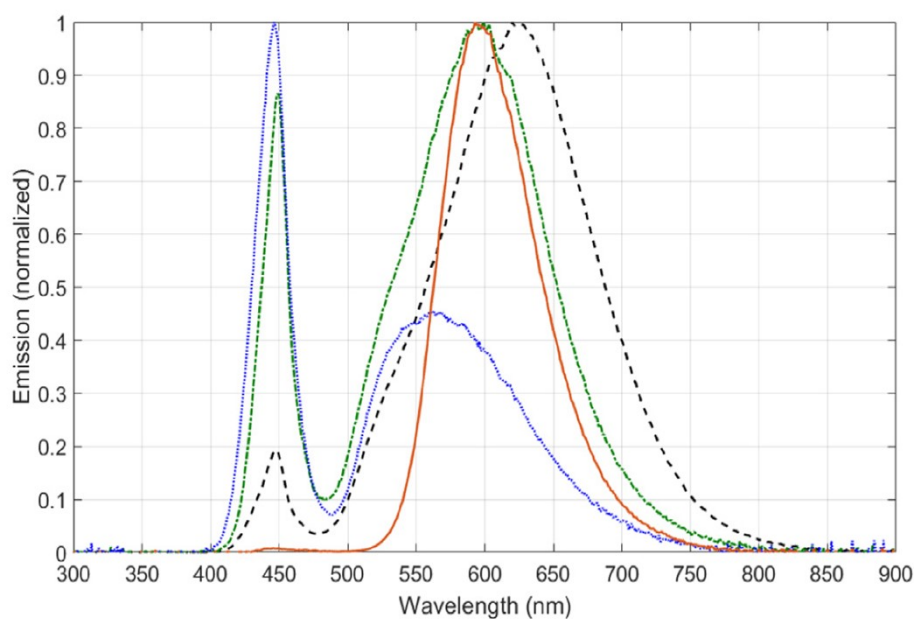

**Fig. S1.** Normalized spectrum of LED lamps found in street lightings. PC Amber from Philips with CCT of 1765 K (orange solid). Warm from Ignialight with CCT of 2159 K (black dashed). LED from Madrid street lights with CCT of 3107 K (green dash-dot). BLED at Faculty of Pharmacy from Universidad Complutense with CCT of 6801 K (blue dots) [1, 2]. Reproduced with permission from ref. [1] Copyright © 2021 Elsevier B.V.

## 1.2. SEM Analysis

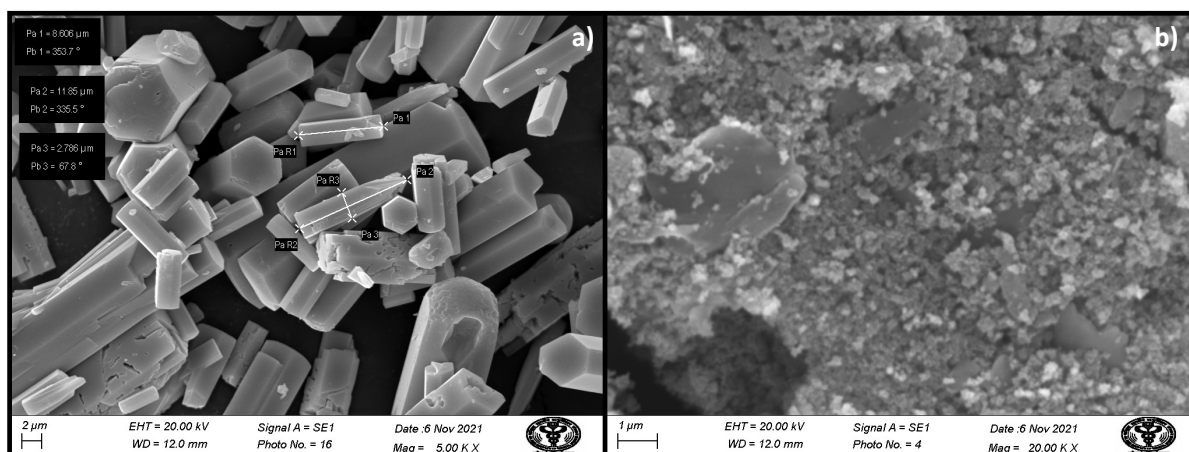

Figure S2. SEM images of a) MoO<sub>3</sub> rods and b) FSZM photocatalyst

## 1.3. XRD Analysis

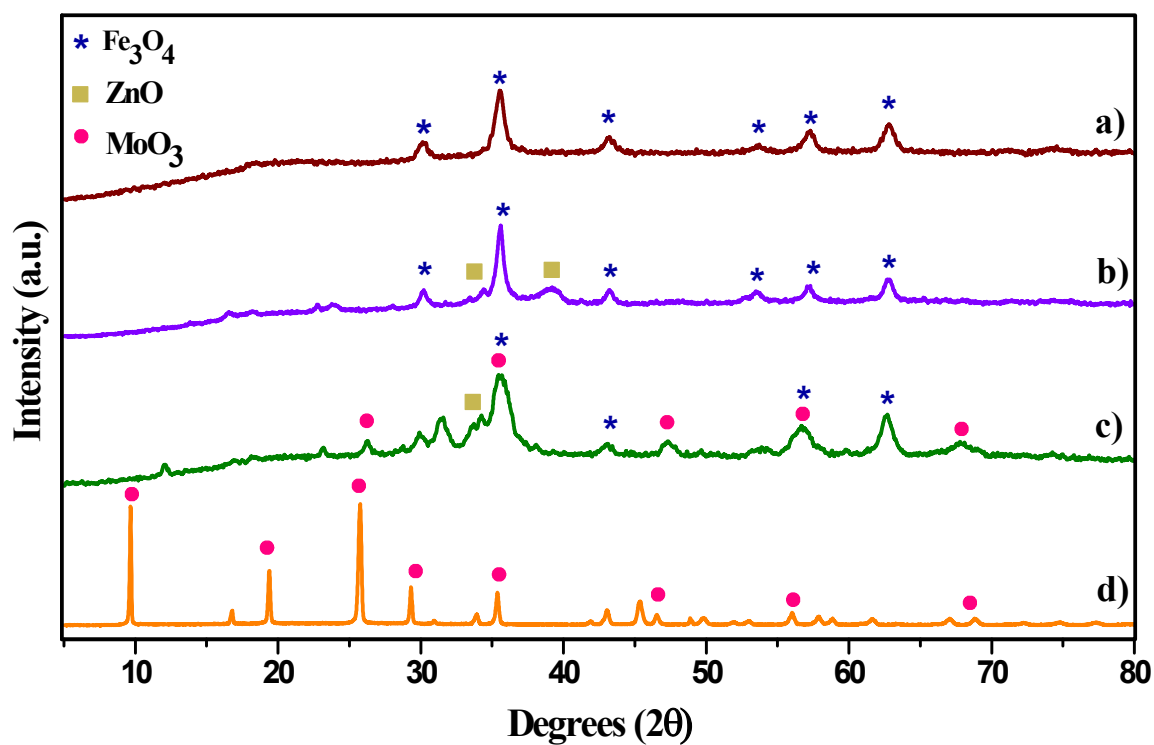

Figure S3. Powder XRD patterns of a) F, b) FSZ, c) FSZM and d) MoO<sub>3</sub> rods.

## 1.4. FTIR Analysis

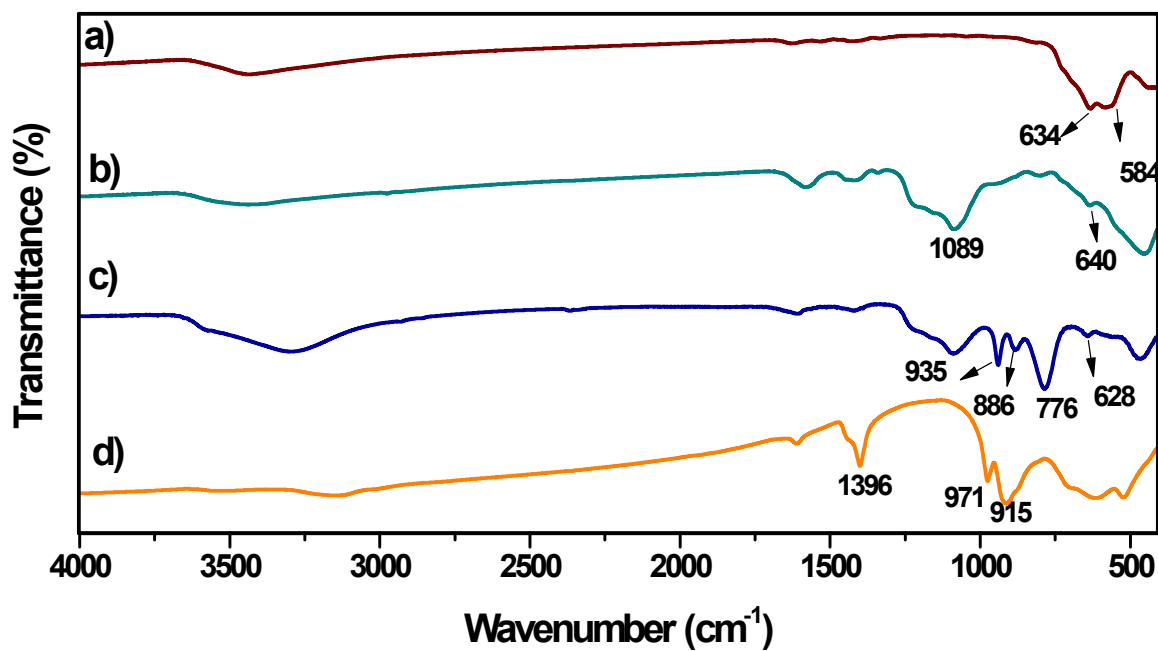

Figure S4. FTIR spectra of a) F, b) FSZ, c) FSZM and d) MoO<sub>3</sub> rods.

### 1.5. TGA Analysis

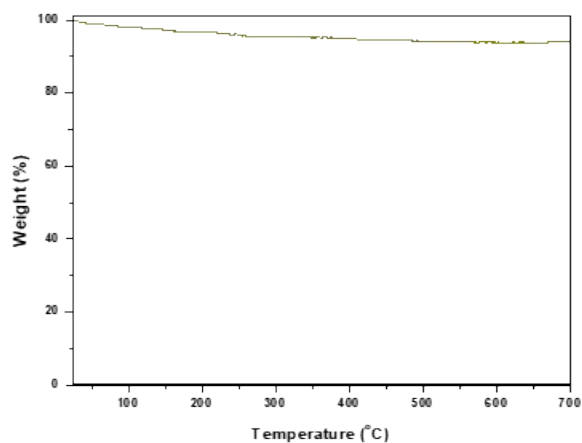

Figure S5. TGA curve of FSZM photocatalyst

### 1.6. VSM Analysis

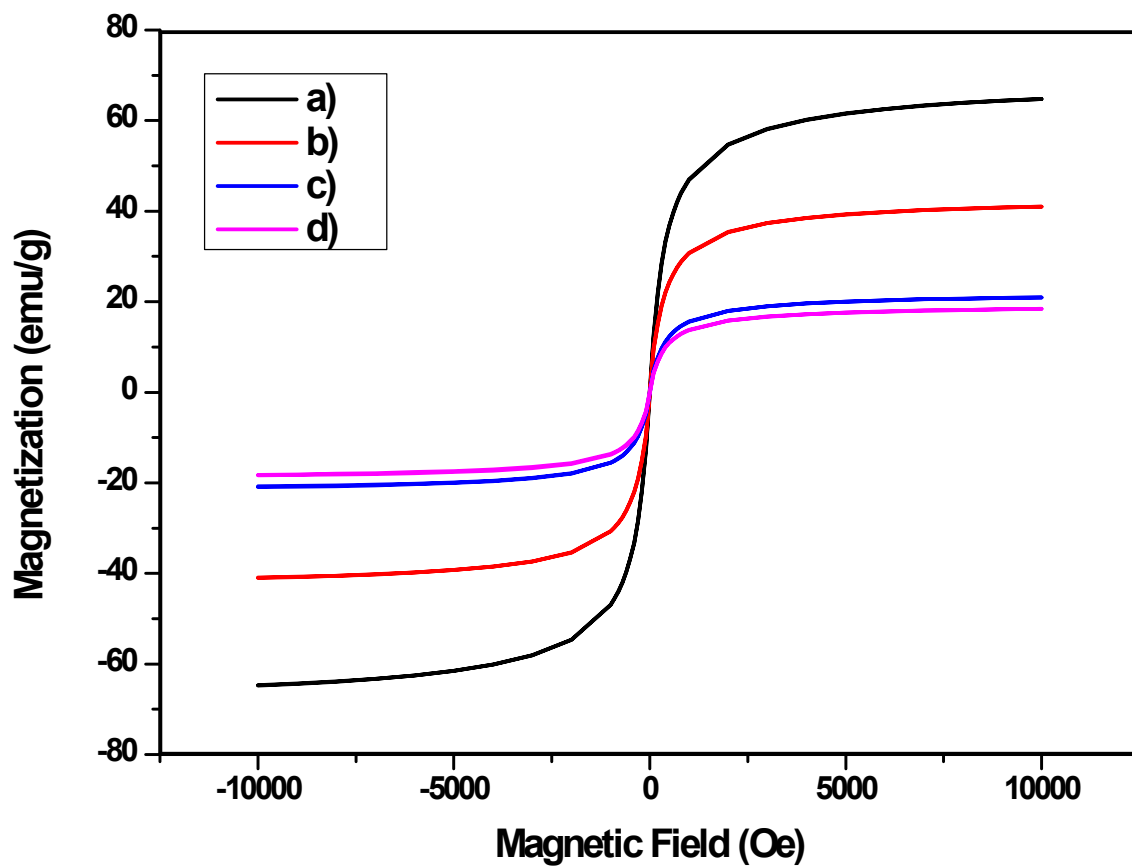

Figure S6. VSM analysis of a) F, b) FS, c) FSZ and d) FSZM photocatalyst

### 1.7. ED-XRF and EDX Analysis

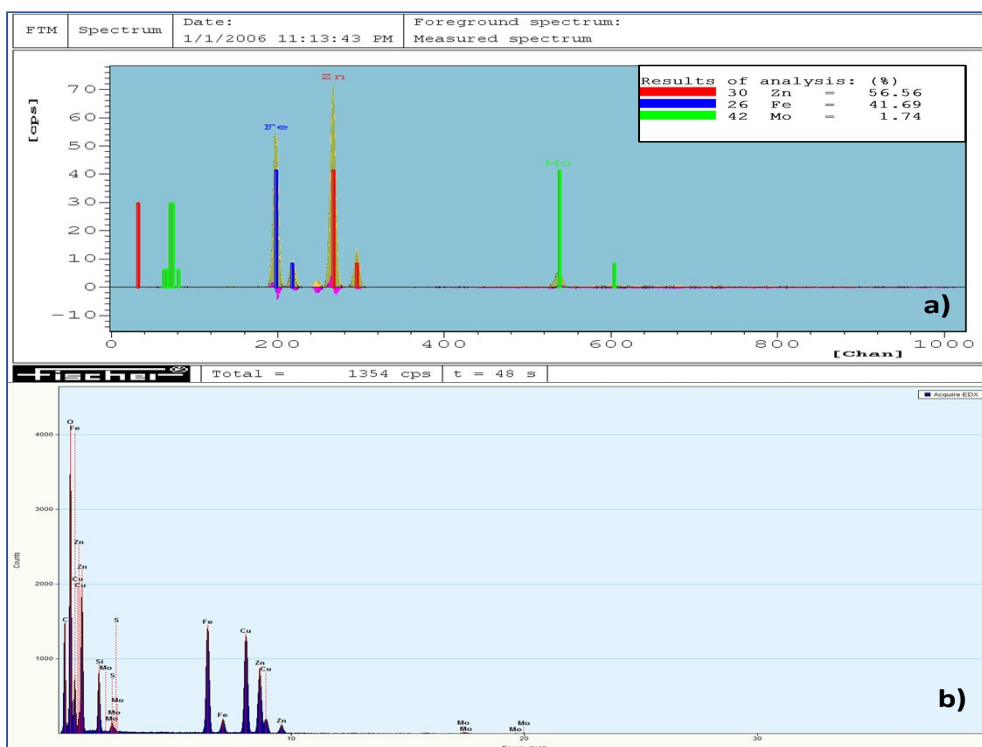

**Figure S7.** a) EDS and b) ED-XRF spectra of FSZM

## 2. Tables

**Table S1a.** Comparison of the catalytic activities of C-H arylation of thiophene with arenes with the earlier reported photocatalysts.

| Entry | Catalyst                                                            | Light Source                              | Time       | Temp      | Reusability | Yield      | Ref |
|-------|---------------------------------------------------------------------|-------------------------------------------|------------|-----------|-------------|------------|-----|
| 1.    | Bi <sub>2</sub> O <sub>3</sub> (5 mol%)                             | 23 W                                      | 15 h       | RT        | -           | 47%        | [1] |
| 2.    | g-C <sub>3</sub> N <sub>4</sub> /rGO                                | Daylight lamp                             | 1.5 h      | RT        | 5           | 74%        | [2] |
| 3.    | Fe <sub>3</sub> O <sub>4</sub> @Cu <sub>2</sub> xS-MoS <sub>2</sub> | Xenon lamp,<br>300 W                      | 1 h        | RT        | 6           | 77%        | [3] |
| 4.    | Black Phosphorous<br>(0.25 mmol)                                    | 150 W metal<br>halide lamp                | 2 h        | 25 °C     | 5           | 75%        | [4] |
| 5.    | CNPVPy20                                                            | White LED<br>lamp, 30 W                   | 1 h        | RT        | 8           | 83%        | [5] |
| 6.    | PAF-BT(EDOT) <sub>2</sub><br>(2mg)                                  | 23 W energy<br>saving bulb                | 24 h       | RT        | 5           | 93%        | [6] |
| 7.    | (AcrH <sub>2</sub> ) (10 mol%)                                      | 3 W blue LED                              | 12 h       | RT        | -           | 73%        | [7] |
| 8.    | Iodo-bodipys                                                        | 35 W Xenon<br>lamp                        | 1 h        | 20 °C     | -           | 72%        | [8] |
| 9.    | Cercosporin (1<br>mol%)                                             | Sunlight                                  | 16 h       | RT        | -           | 69%        | [9] |
| 10.   | <b>This work</b>                                                    | <b>(2×12) W<br/>Philips LED<br/>bulbs</b> | <b>7 h</b> | <b>RT</b> | <b>5</b>    | <b>87%</b> |     |

**Table S1b.** Comparison of the degradation efficiency of earlier reported heterogeneous photocatalysts towards Rhodamine B dye

| S.No | Catalyst                                              | Oxidants                           | Dye Concentration    | Light source       | Time    | pH   | Degradation percentage | Reusability | Ref  |
|------|-------------------------------------------------------|------------------------------------|----------------------|--------------------|---------|------|------------------------|-------------|------|
| 1.   | PES/CCTO                                              | -                                  | 5 mg/L               | 360 W UV lamp      | 40 min  | -    | 74.66 %                | -           | [10] |
| 2.   | TiO <sub>2</sub> /ZrO <sub>2</sub>                    | -                                  | 10 mg/L              | 120 W UV light     | 270 min | 7-11 | 90.5 %                 | 6           | [11] |
| 3.   | Bi <sub>x</sub> Sb <sub>2-x</sub> S <sub>3</sub>      | -                                  | 10 mg/L              | 60 W CFL           | 30 min  | -    | 98 %                   | 5           | [12] |
| 4.   | Fe-TiO <sub>2</sub> /rGO                              | 8 mM H <sub>2</sub> O <sub>2</sub> | 20 mg/L              | 150 W Xe lamp      | 120 min | 6    | 91 %                   | 5           | [13] |
| 5.   | ZnO                                                   | -                                  | 10 mg/L              | 400 W UV lamp      | 70 min  | -    | 97.7 %                 | -           | [14] |
| 6.   | CdS/AgBr-rGO                                          | -                                  | 5×10 <sup>-5</sup> M | 500 W Xe lamp      | 60 min  | -    | 95.8 %                 | 4           | [15] |
| 7.   | Ti-MCM-41                                             | -                                  | 1×10 <sup>-4</sup> M | 1000 W Xe arc lamp | 600 min | -    | 87 %                   | -           | [16] |
| 9.   | Bi <sub>2</sub> S <sub>3</sub> /3DOM-TiO <sub>2</sub> | -                                  | 10 mg/L              | 250 W Xe lamp      | 360 min | -    | 96 %                   | 4           | [17] |
| 10.  | BW/N-B                                                | -                                  | 10 mg/L              | 500 W Xe lamp      | 45 min  | -    | 99.1 %                 | 4           | [18] |
| 11.  | ZnO                                                   | -                                  | 10 mg/L              | 330 W UV light     | 160 min | -    | 95.41 %                | -           | [19] |

|     |                                                                                   |   |                      |                                        |            |   |        |   |              |
|-----|-----------------------------------------------------------------------------------|---|----------------------|----------------------------------------|------------|---|--------|---|--------------|
| 12. | SnO <sub>2</sub> / Bi <sub>2</sub> S <sub>3</sub> -Bi <sub>2</sub> O <sub>3</sub> | - | 10 mg/L              | 300 W<br>sunlight<br>simulated<br>lamp | 180<br>min | - | 80.0 % | 4 | [20]         |
| 13. | FeWO <sub>4</sub> /CNN                                                            | - | 10 mg/L              | Natural<br>sunlight                    | 90<br>min  | - | 86.2 % | 4 | [21]         |
| 14. | Au-ZnO                                                                            | - | 10 mg/L              | UV light                               | 180<br>min | 6 | 95 %   | - | [22]         |
| 15. | TiO <sub>2</sub> /g-C <sub>3</sub> N <sub>4</sub>                                 | - | 10 mg/L              | 500 W xenon<br>lamp                    | 20<br>min  | - | 88%    | 4 | [23]         |
| 16. | ZnO/MoO <sub>3</sub>                                                              | - | 1×10 <sup>-5</sup> M | 46 W visible<br>light LEDs             | 90<br>min  | - | 96.9 % | 5 | Present work |

### 3. <sup>1</sup>H AND <sup>13</sup>C NMR data of the corresponding products

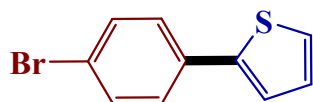

**2-(4-bromophenyl) thiophene (3a).** The compound was synthesized by adopting General procedure 2.3.1. and purified by column chromatography (100% Petroleum ether). White Solid, Melting Point: 82.4-83.9 °C, <sup>1</sup>H-NMR (400 MHz, CDCl<sub>3</sub>) δ 7.51 (dd, *J* = 12.5, 8.8 Hz, 4H), 7.33 (d, *J* = 4.3 Hz, 2H), 7.11 (t, *J* = 4.4 Hz, 1H); <sup>13</sup>C-NMR (101 MHz, CDCl<sub>3</sub>) δ 143.1, 133.3, 131.9, 128.1, 127.4, 125.2, 123.5, 121.2.



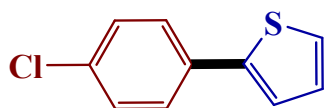

**2-(4-chlorophenyl) thiophene (3b).** The compound was synthesized by adopting General procedure A and purified by column chromatography (100% Petroleum ether). White Solid, Melting Point: 80.0-81.6 °C,  $^1\text{H-NMR}$  (400 MHz,  $\text{CDCl}_3$ )  $\delta$  7.57 (d,  $J = 8.5$  Hz, 2H), 7.37 (d,  $J = 8.5$  Hz, 2H), 7.32 (d,  $J = 5.0$  Hz, 2H), 7.11 (t,  $J = 4.3$  Hz, 1H);  $^{13}\text{C-NMR}$  (101 MHz,  $\text{CDCl}_3$ )  $\delta$  143.0, 133.2, 132.9, 129.0, 128.1, 127.1, 125.2, 123.4.

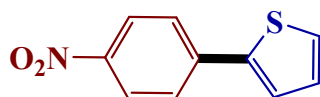

**2-(4-nitrophenyl) thiophene (3c).** The compound was synthesized by adopting General procedure A and purified by column chromatography (100% Petroleum ether). White Solid, Melting Point: 135.2-137.9 °C,  $^1\text{H-NMR}$  (400 MHz,  $\text{CDCl}_3$ )  $\delta$  8.29-8.24 (m, 2H), 7.76 (d,  $J = 8.8$  Hz, 2H), 7.50-7.47 (m, 2H), 7.17 (t,  $J = 4.3$  Hz, 1H);  $^{13}\text{C-NMR}$  (101 MHz,  $\text{CDCl}_3$ )  $\delta$  146.5, 141.5, 140.5, 128.7, 127.7, 126.0, 125.7, 124.4.

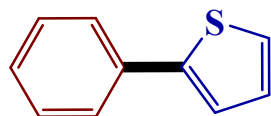

**2-phenyl thiophene (3d).** The compound was synthesized by adopting General procedure A and purified by column chromatography (100% Petroleum ether). Colourless oil,  $^1\text{H-NMR}$  (400 MHz,  $\text{CDCl}_3$ )  $\delta$  7.64 (d,  $J = 7.5$  Hz, 2H), 7.40 (t,  $J = 7.6$  Hz, 2H), 7.34-7.30 (m, 3H), 7.11 (d,  $J = 8.5$  Hz, 1H);  $^{13}\text{C-NMR}$  (101 MHz,  $\text{CDCl}_3$ )  $\delta$  144.4, 134.4, 128.8, 127.9, 127.4, 125.9, 124.7, 123.0.

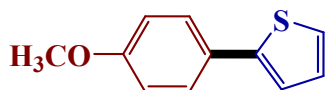

**2-(4-methoxyphenyl) thiophene (3e).** The compound was synthesized by adopting General procedure A and purified by column chromatography (100% Petroleum ether). White Solid, Melting Point: 106.0-108.0 °C,  $^1\text{H-NMR}$  (400 MHz,  $\text{CDCl}_3$ )  $\delta$  7.57 (d,  $J = 8.8$  Hz, 2H), 7.23 (d,  $J = 9.5$  Hz, 2H), 7.09-7.07 (m, 1H), 6.94 (d,  $J = 8.8$  Hz, 2H), 3.86 (s, 3H);  $^{13}\text{C-NMR}$  (101 MHz,  $\text{CDCl}_3$ )  $\delta$  159.1, 144.3, 127.9, 127.2, 123.8, 122.0, 114.2, 55.3.

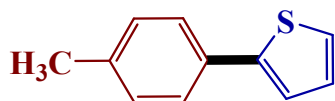

**2-(4-methylphenyl) thiophene (3f).** The compound was synthesized by adopting General procedure A and purified by column chromatography (100% Petroleum ether). Yellow oil,  $^1\text{H-NMR}$  (400 MHz,  $\text{CDCl}_3$ )  $\delta$  7.55 (d,  $J = 8.3$  Hz, 2H), 7.31-7.27 (m, 2H), 7.22 (d,  $J = 7.8$  Hz, 2H), 7.10 (dd,  $J = 5.0, 3.5$  Hz, 1H), 2.40 (s, 3H);  $^{13}\text{C-NMR}$  (101 MHz,  $\text{CDCl}_3$ )  $\delta$  144.6, 137.3, 129.5, 127.9, 125.9, 124.3, 122.6, 21.2.

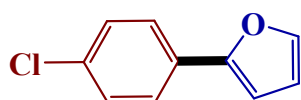

**2-(4-chlorophenyl) furan (3g).** The compound was synthesized by adopting General procedure A and purified by column chromatography (100% Petroleum ether). Colourless Solid, Melting Point: 66-68.2 °C,  $^1\text{H-NMR}$  (400 MHz,  $\text{CDCl}_3$ )  $\delta$  7.59 (dd,  $J = 6.7, 2.0$  Hz, 2H), 7.46 (s, 1H), 7.34 (dd,  $J = 6.7, 2.1$  Hz, 2H), 6.63 (d,  $J = 3.3$  Hz, 1H), 6.47 (q,  $J = 1.7$  Hz, 1H);  $^{13}\text{C-NMR}$  (101 MHz,  $\text{CDCl}_3$ )  $\delta$  153.0, 142.4, 133.0, 129.4, 128.9, 125.1, 111.8, 105.5.

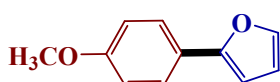

**2-(4-methoxyphenyl) furan (3h).** The compound was synthesized by adopting General procedure A and purified by column chromatography (100% Petroleum ether). White Solid, Melting Point: 48.7-50.0 °C,  $^1\text{H-NMR}$  (400 MHz,  $\text{CDCl}_3$ )  $\delta$  7.59 (d,  $J = 8.9$  Hz, 2H), 7.42 (s, 1H), 6.91 (d,  $J = 8.9$  Hz, 2H), 6.51 (s, 1H), 6.43 (s, 1H), 3.82 (s, 3H);  $^{13}\text{C-NMR}$  (101 MHz,  $\text{CDCl}_3$ )  $\delta$  159.0, 154.1, 141.4, 125.3, 123.9, 114.1, 111.6, 103.4, 55.4.

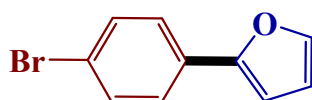

**2-(4-bromophenyl) furan (3i).** The compound was synthesized by adopting General procedure A and purified by column chromatography (100% Petroleum ether). Colourless

Solid, Melting Point: 73.0-74.8 °C,  $^1\text{H-NMR}$  (400 MHz,  $\text{CDCl}_3$ )  $\delta$  7.53-7.46 (m, 5H), 6.64 (s, 1H), 6.47 (s, 1H);  $^{13}\text{C-NMR}$  (101 MHz,  $\text{CDCl}_3$ )  $\delta$  153.0, 142.4, 131.8, 129.8, 125.3, 121.1, 111.9, 105.6.

#### 4. $^1\text{H}$ AND $^{13}\text{C}$ NMR spectra of the corresponding products

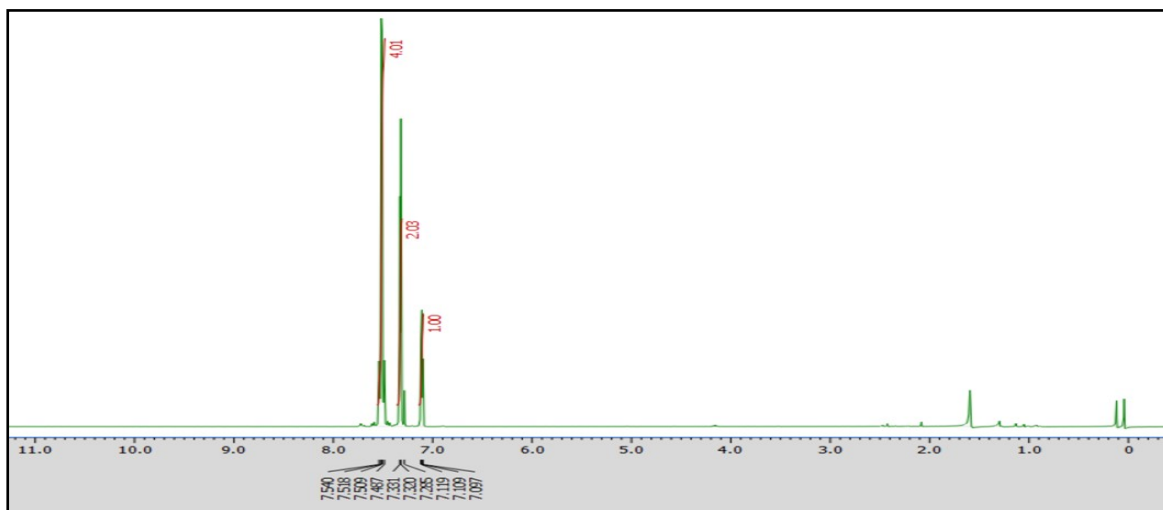

Figure S8.  $^1\text{H-NMR}$  (400 MHz,  $\text{CDCl}_3$ ) of 2-(4-bromophenyl) thiophene (3a).

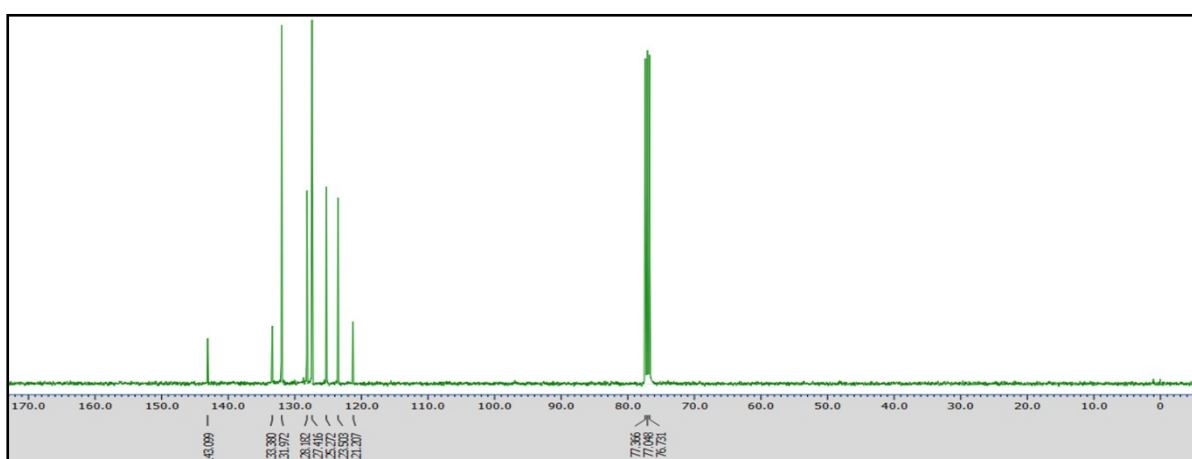

Figure S9.  $^{13}\text{C-NMR}$  (101 MHz,  $\text{CDCl}_3$ ) of 2-(4-bromophenyl) thiophene (3a).

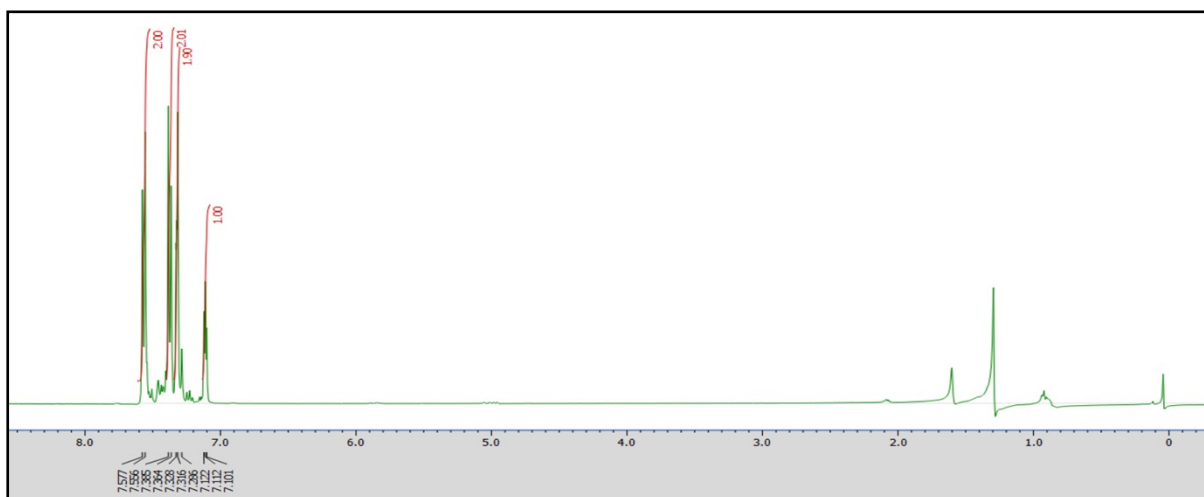

**Figure S10.**  $^1\text{H-NMR}$  (400 MHz,  $\text{CDCl}_3$ ) of 2-(4-chlorophenyl) thiophene (**3b**).

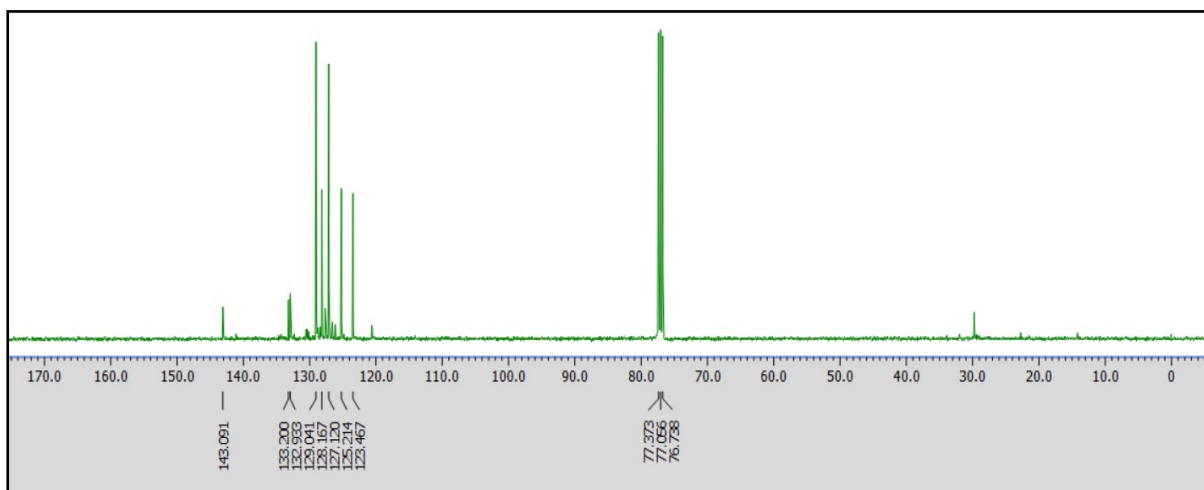

**Figure S11.**  $^{13}\text{C-NMR}$  (101 MHz,  $\text{CDCl}_3$ ) of 2-(4-chlorophenyl) thiophene (**3b**).

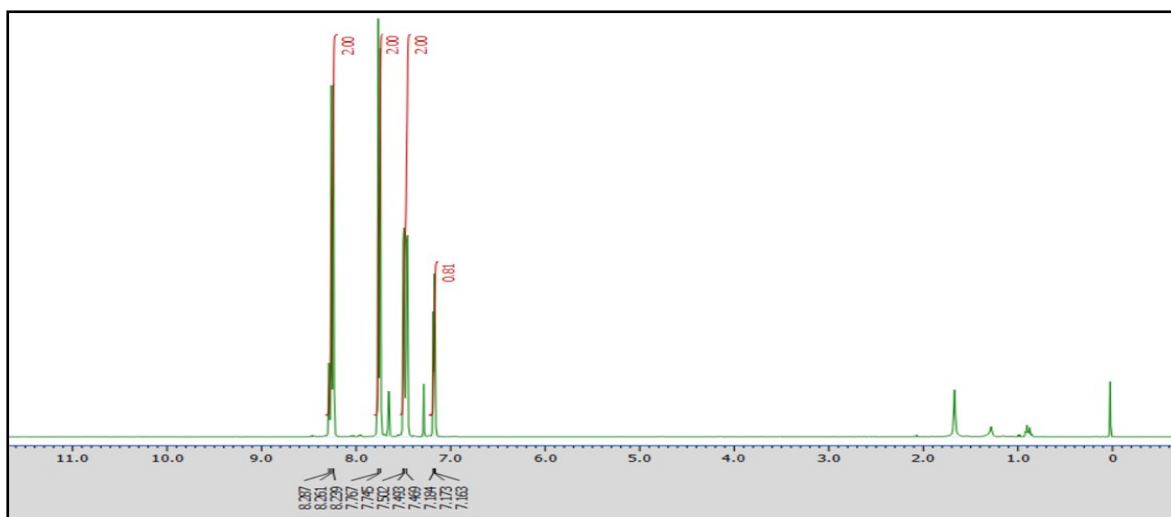

**Figure S12.**  $^1\text{H-NMR}$  (400 MHz,  $\text{CDCl}_3$ ) of 2-(4-nitrophenyl) thiophene (**3c**).

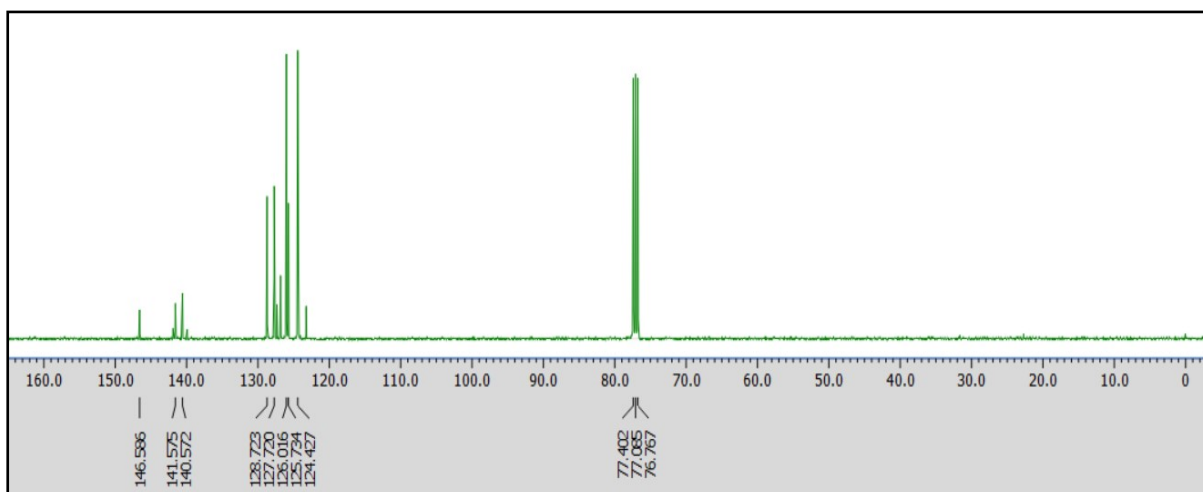

**Figure S13.**  $^{13}\text{C-NMR}$  (101 MHz,  $\text{CDCl}_3$ ) of 2-(4-nitrophenyl) thiophene (**3c**).

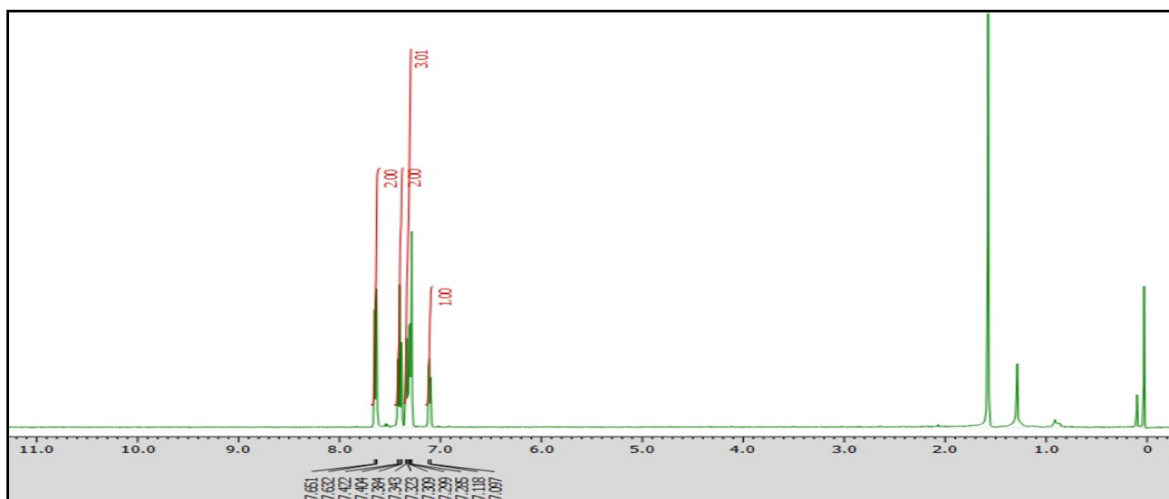

Figure S14. <sup>1</sup>H-NMR (400 MHz, CDCl<sub>3</sub>) of 2-phenyl thiophene (3d).

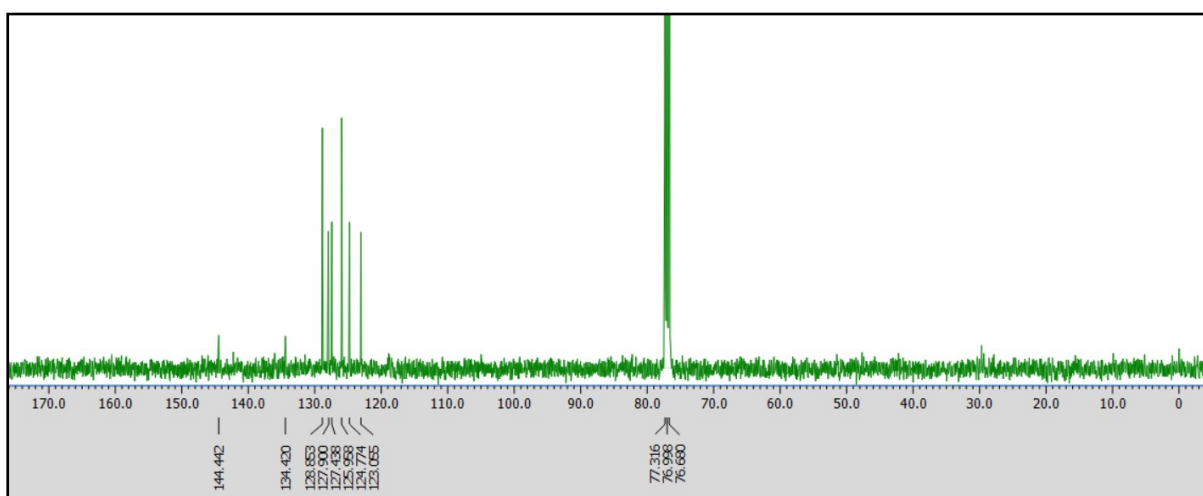

Figure S15. <sup>13</sup>C-NMR (101 MHz, CDCl<sub>3</sub>) of 2-phenyl thiophene (3d).

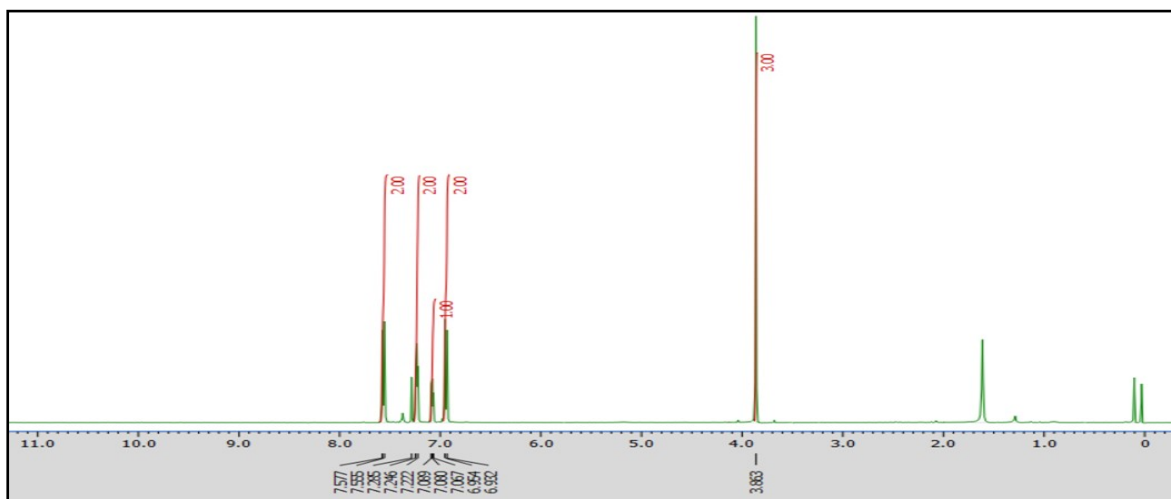

**Figure S16.**  $^1\text{H-NMR}$  (400 MHz,  $\text{CDCl}_3$ ) of 2-(4-methoxyphenyl) thiophene (**3e**).

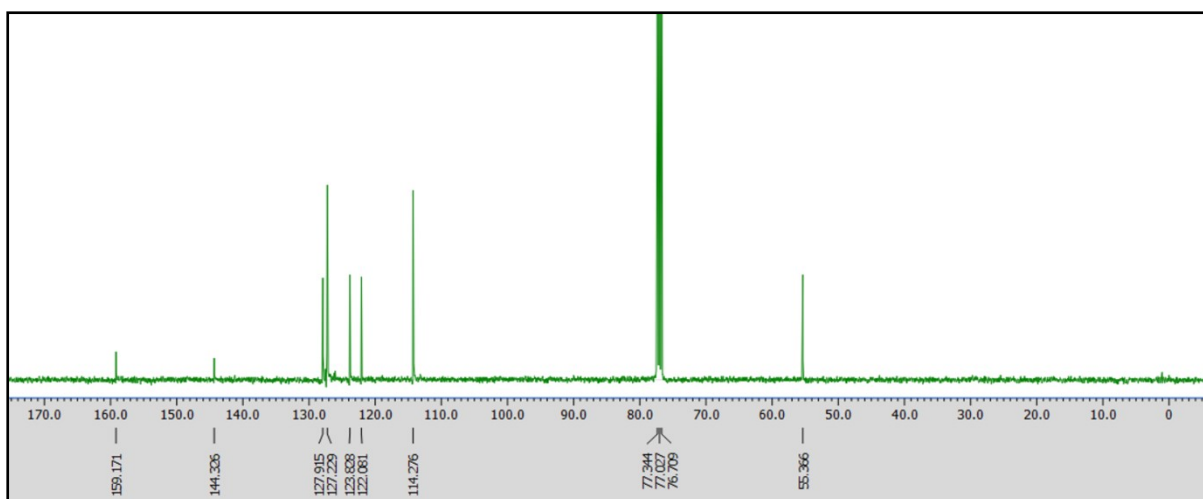

**Figure S17.**  $^{13}\text{C-NMR}$  (101 MHz,  $\text{CDCl}_3$ ) of 2-(4-methoxyphenyl) thiophene (**3e**).

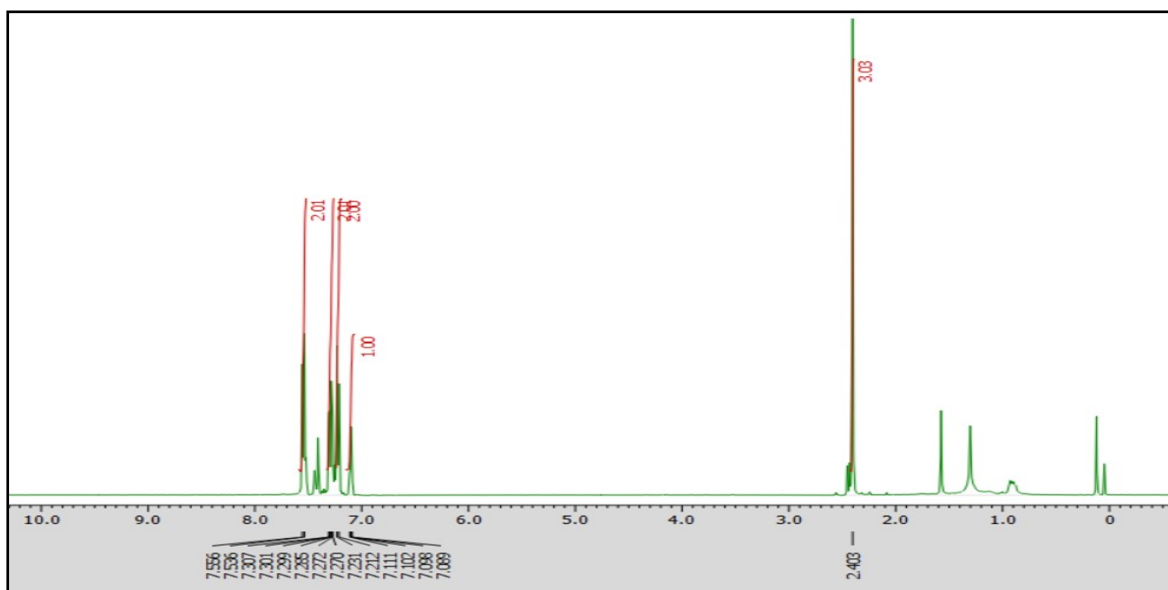

**Figure S18.**  $^1\text{H-NMR}$  (400 MHz,  $\text{CDCl}_3$ ) of 2-(4-methylphenyl) thiophene (3f).

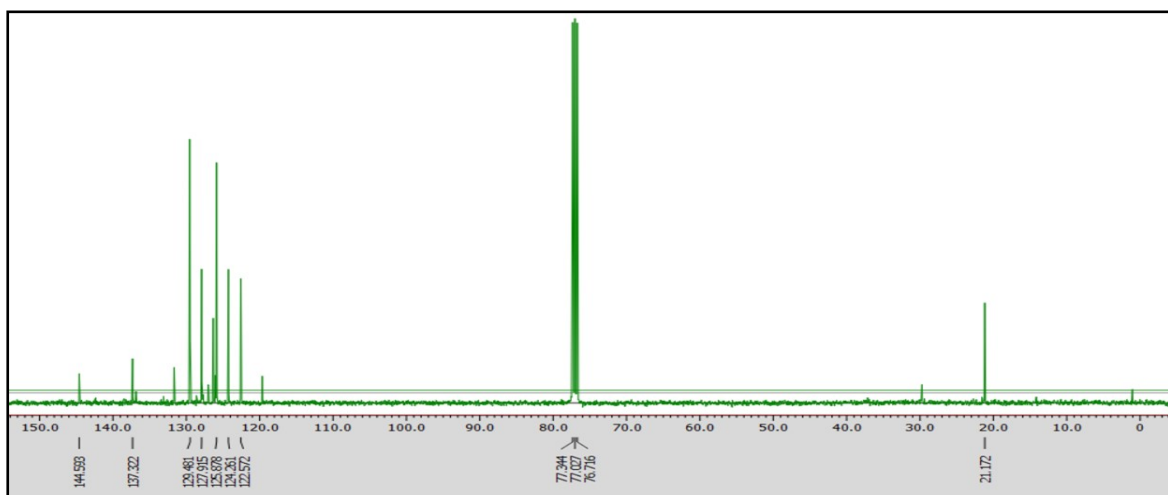

**Figure S19.**  $^{13}\text{C-NMR}$  (101 MHz,  $\text{CDCl}_3$ ) of 2-(4-methylphenyl) thiophene (3f).



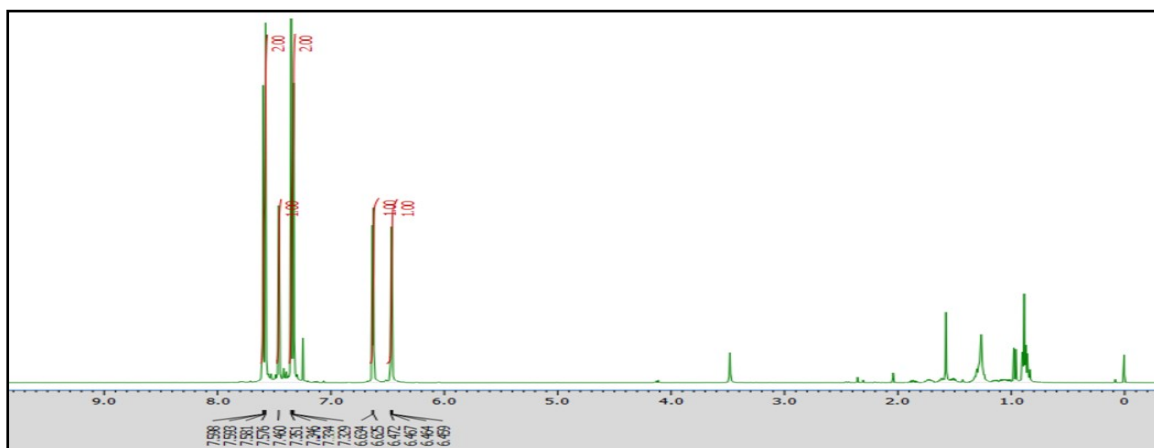

Figure S20.  $^1\text{H-NMR}$  (400 MHz,  $\text{CDCl}_3$ ) of 2-(4-chlorophenyl) furan (3g).

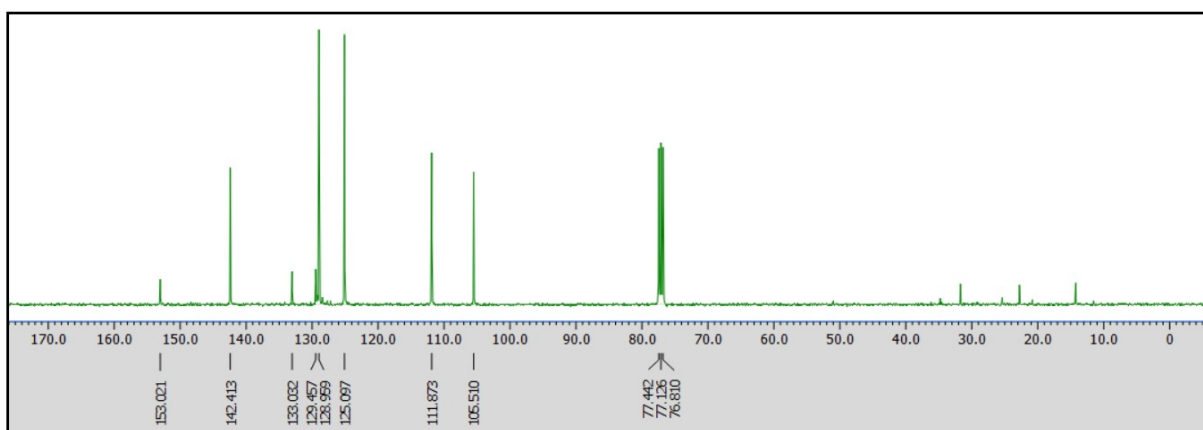

Figure S21.  $^{13}\text{C-NMR}$  (101 MHz,  $\text{CDCl}_3$ ) of 2-(4-chlorophenyl) furan (3g).

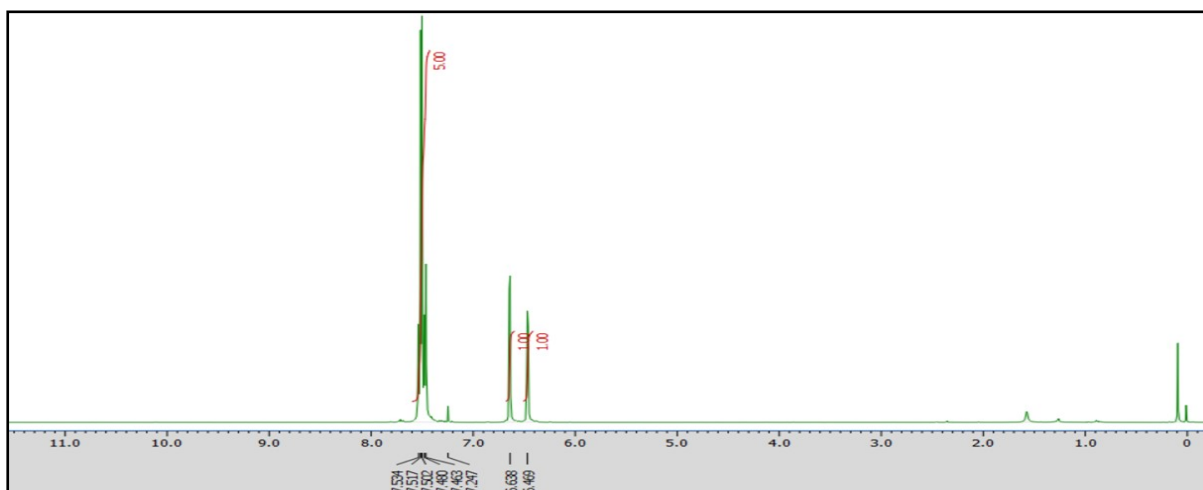

**Figure S22.** <sup>1</sup>H NMR (400 MHz, CDCl<sub>3</sub>) of 2-(4-bromophenyl) furan (3h)

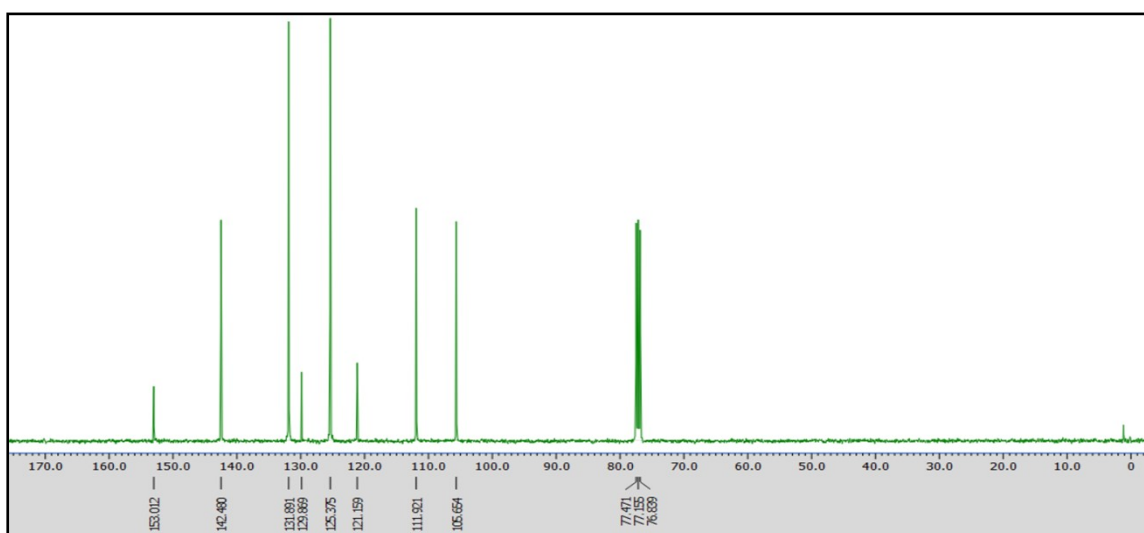

**Figure S23.** <sup>13</sup>C-NMR (400 MHz, CDCl<sub>3</sub>) of 2-(4-bromophenyl) furan (3h)

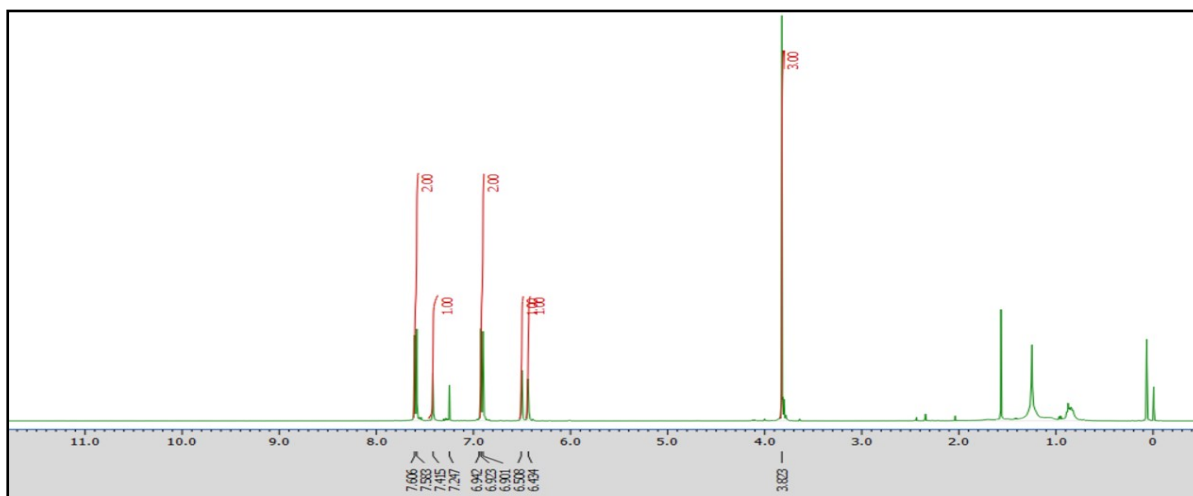

**Figure S24.**  $^1\text{H}$ -NMR (400 MHz,  $\text{CDCl}_3$ ) of 2-(4-methoxyphenyl) furan (**3i**).

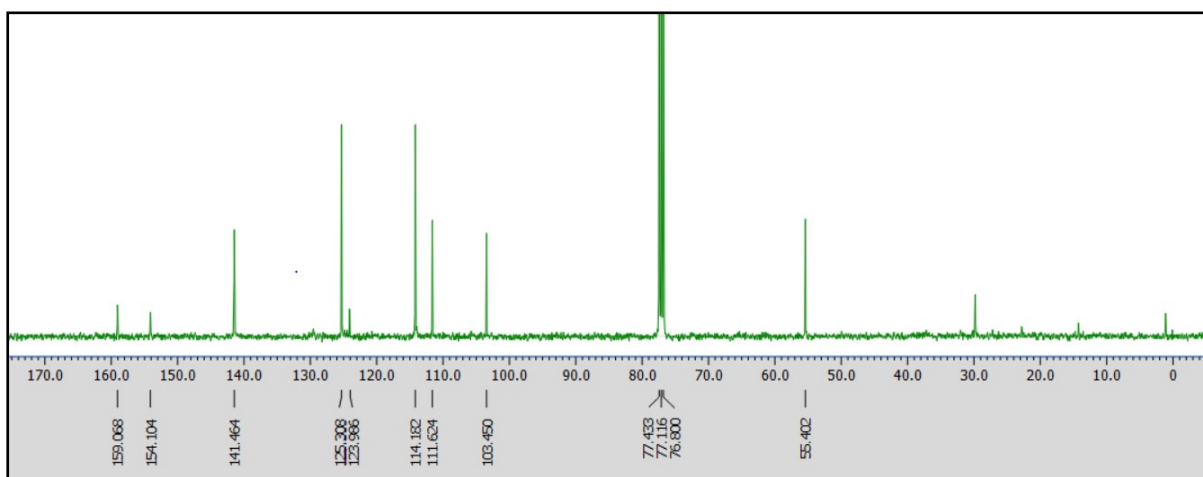

**Figure S25.**  $^{13}\text{C}$ -NMR (101 MHz,  $\text{CDCl}_3$ ) of 2-(4-methoxyphenyl) furan (**3i**).

## 5. GCMS Spectra

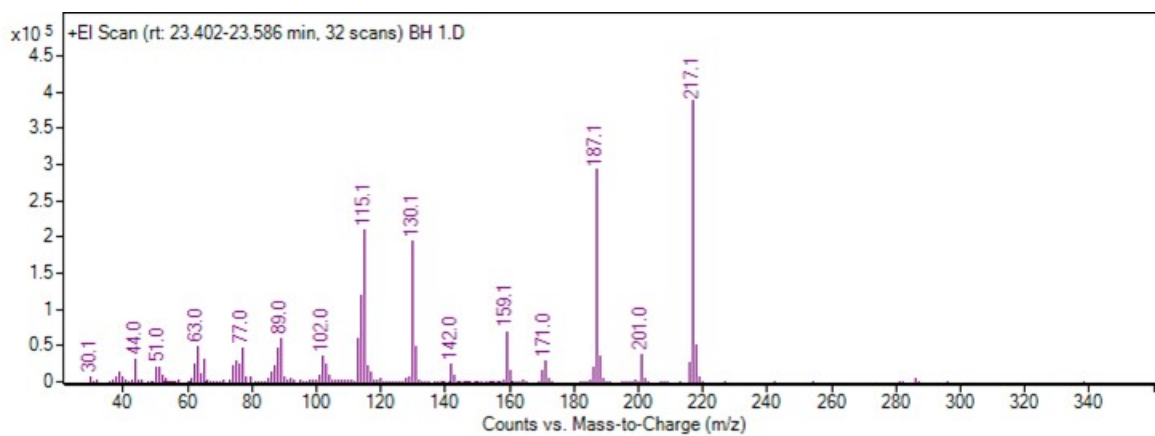

**Figure S26.** Mass spectra of dantrolene precursor (5-(4-Nitrophenyl)-2-furancarboxaldehyde)

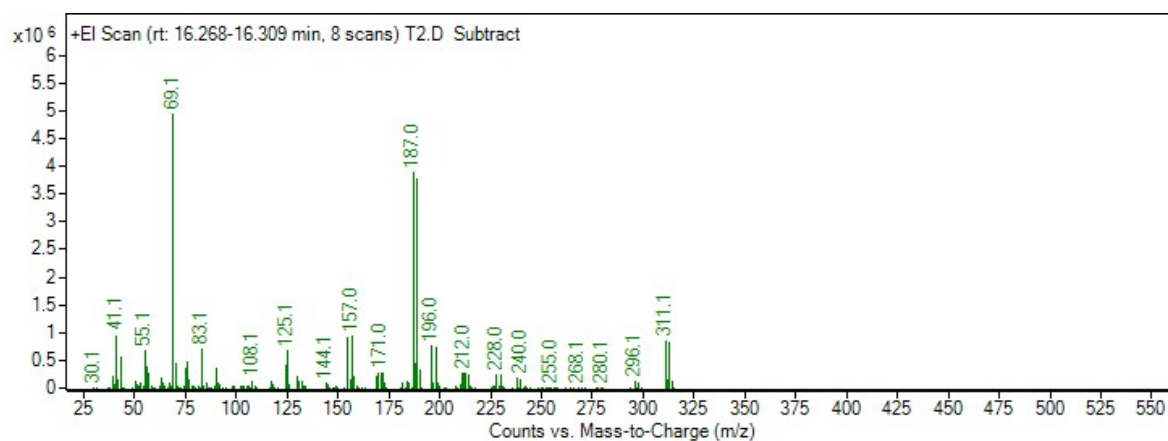

**Figure S27.** Mass spectra of TEMPO trapped intermediate complex

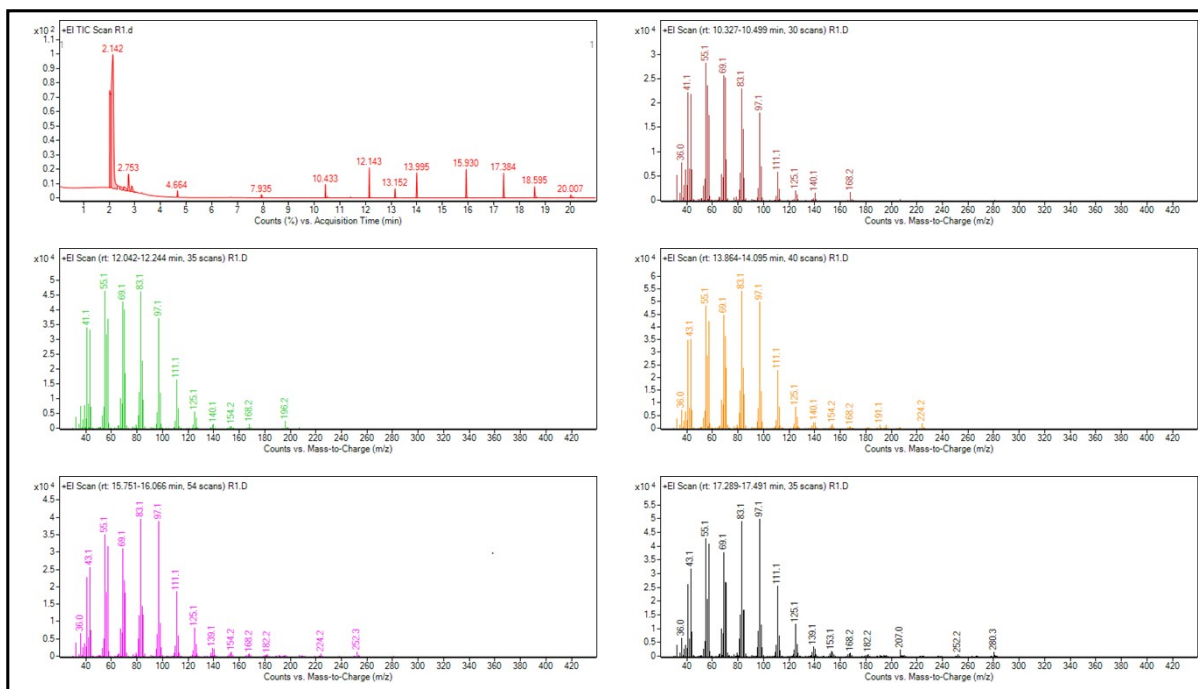

**Figure S28.** GC-MS spectra of Rhodamine B dye degradation

## 6. Photoreactor setup

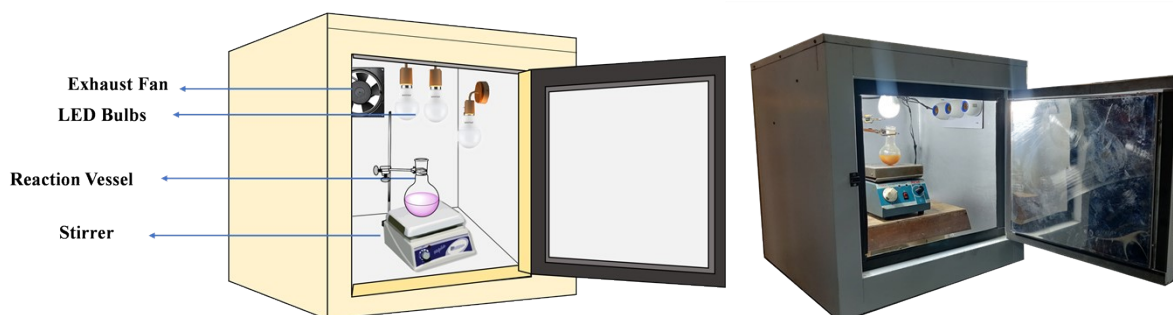

## 7. References

- (1) Buglioni, L.; Riente, P.; Palomares, E.; Pericàs, M. A. Visible-light-promoted arylation reactions photocatalyzed by bismuth (III) oxide. *European Journal of Organic Chemistry* 2017, 2017 (46), 6986-6990.
- (2) Cai, X.; Liu, H.; Zhi, L.; Wen, H.; Yu, A.; Li, L.; Chen, F.; Wang, B. A gC 3 N 4/rGO nanocomposite as a highly efficient metal-free photocatalyst for direct C–H arylation under visible light irradiation. *RSC advances* 2017, 7 (73), 46132-46138.
- (3) Zhi, L.; Zhang, H.; Yang, Z.; Liu, W.; Wang, B. Interface coassembly of mesoporous MoS<sub>2</sub> based-frameworks for enhanced near-infrared light driven photocatalysis. *Chemical Communications* 2016, 52 (38), 6431-6434.

- (4) Kalay, E.; Küçükkeçeci, H.; Kilic, H.; Metin, Ö. Black phosphorus as a metal-free, visible-light-active heterogeneous photoredox catalyst for the direct C–H arylation of heteroarenes. *Chemical Communications* 2020, 56 (44), 5901-5904.
- (5) Liu, J.; Wang, H.; Bai, J.; Li, T.; Yang, Y.; Peng, Y.; Wang, B. Gram-scale synthesis of aligned C<sub>3</sub>N<sub>4</sub>-polypyrrole heterojunction aerogels with tunable band structures as efficient visible and near infrared light-driven metal-free photocatalysts. *Journal of Materials Chemistry A* 2017, 5 (47), 24920-24928.
- (6) Huber, N.; Zhang, K. A. Porous aromatic frameworks with precisely controllable conjugation lengths for visible light-driven photocatalytic selective CH activation reactions. *European Polymer Journal* 2020, 140, 110060.
- (7) Feng, Y.-S.; Bu, X.-S.; Huang, B.; Rong, C.; Dai, J.-J.; Xu, J.; Xu, H.-J. NADH coenzyme model compound as photocatalyst for the direct arylation of (hetero) arenes. *Tetrahedron Letters* 2017, 58 (20), 1939-1942.
- (8) Huang, L.; Zhao, J. Iodo-Bodipys as visible-light-absorbing dual-functional photoredox catalysts for preparation of highly functionalized organic compounds by formation of C–C bonds via reductive and oxidative quenching catalytic mechanisms. *RSC advances* 2013, 3 (45), 23377-23388.
- (9) Zhang, S.; Tang, Z.; Bao, W.; Li, J.; Guo, B.; Huang, S.; Zhang, Y.; Rao, Y. Perylenequinonoid-catalyzed photoredox activation for the direct arylation of (het) arenes with sunlight. *Organic & biomolecular chemistry* 2019, 17 (17), 4364-4369.
- (10) Otitoju, T. A.; Jiang, D.; Ouyang, Y.; Elamin, M. A. M.; Li, S. Photocatalytic degradation of Rhodamine B using CaCu<sub>3</sub>Ti<sub>4</sub>O<sub>12</sub> embedded polyethersulfone hollow fiber membrane. *Journal of industrial and engineering chemistry* 2020, 83, 145-152.
- (11) Tian, J.; Shao, Q.; Zhao, J.; Pan, D.; Dong, M.; Jia, C.; Ding, T.; Wu, T.; Guo, Z. Microwave solvothermal carboxymethyl chitosan templated synthesis of TiO<sub>2</sub>/ZrO<sub>2</sub> composites toward enhanced photocatalytic degradation of Rhodamine B. *Journal of colloid and interface science* 2019, 541, 18-29.
- (12) Dashairya, L.; Mehta, A.; Saha, P.; Basu, S. Visible-light-induced enhanced photocatalytic degradation of Rhodamine-B dye using Bi<sub>2</sub>Sb<sub>2</sub>-xS<sub>3</sub> solid-solution photocatalysts. *Journal of colloid and interface science* 2020, 561, 71-82.
- (13) Isari, A. A.; Payan, A.; Fattahi, M.; Jorfi, S.; Kakavandi, B. Photocatalytic degradation of rhodamine B and real textile wastewater using Fe-doped TiO<sub>2</sub> anchored on reduced graphene oxide (Fe-TiO<sub>2</sub>/rGO): Characterization and feasibility, mechanism and pathway studies. *Applied Surface Science* 2018, 462, 549-564.
- (14) Nandi, P.; Das, D. Photocatalytic degradation of Rhodamine-B dye by stable ZnO nanostructures with different calcination temperature induced defects. *Applied Surface Science* 2019, 465, 546-556.
- (15) Zhang, J.; Zhang, Z.; Zhu, W.; Meng, X. Boosted photocatalytic degradation of Rhodamine B pollutants with Z-scheme CdS/AgBr-rGO nanocomposite. *Applied Surface Science* 2020, 502, 144275.

- (16) Rasalingam, S.; Peng, R.; Koodali, R. T. An insight into the adsorption and photocatalytic degradation of rhodamine B in periodic mesoporous materials. *Applied Catalysis B: Environmental* 2015, 174, 49-59.
- (17) Ma, G.-q.; Liu, F.-s.; Wang, S.; Dang, Z.-c.; Zhang, J.-w.; Fu, X.-j.; Hou, M.-s. Preparation and characterization of Bi<sub>2</sub>S<sub>3</sub>/3DOM-TiO<sub>2</sub> for efficient photocatalytic degradation of rhodamine B. *Materials Science in Semiconductor Processing* 2019, 100, 61-72.
- (18) Wang, T.; Liu, S.; Mao, W.; Bai, Y.; Chiang, K.; Shah, K.; Paz-Ferreiro, J. Novel Bi<sub>2</sub>WO<sub>6</sub> loaded N-biochar composites with enhanced photocatalytic degradation of rhodamine B and Cr (VI). *Journal of Hazardous materials* 2020, 389, 121827.
- (19) Doodoo-Arhin, D.; Asiedu, T.; Agyei-Tuffour, B.; Nyankson, E.; Obada, D.; Mwabora, J. Photocatalytic degradation of Rhodamine dyes using zinc oxide nanoparticles. *Materials Today: Proceedings* 2021, 38, 809-815.
- (20) Fenelon, E.; Bui, D.-P.; Tran, H. H.; You, S.-J.; Wang, Y.-F.; Cao, T. M.; Van Pham, V. Straightforward synthesis of SnO<sub>2</sub>/Bi<sub>2</sub>S<sub>3</sub>/BiOCl–Bi<sub>24</sub>O<sub>31</sub>Cl<sub>10</sub> Composites for drastically enhancing rhodamine B photocatalytic degradation under visible light. *ACS omega* 2020, 5 (32), 20438-20449.
- (21) Dadigala, R.; Bandi, R.; Gangapuram, B. R.; Guttena, V. Construction of in situ self-assembled FeWO<sub>4</sub>/gC<sub>3</sub>N<sub>4</sub> nanosheet heterostructured Z-scheme photocatalysts for enhanced photocatalytic
